# Supplementary figures and images for: A 21 day Daniel Fast improves selected biomarkers of antioxidant status and oxidative stress in men and women
Source: Springer Nature journal article supplement (doi:10.1186/1743-7075-8-17), 2011-01-01

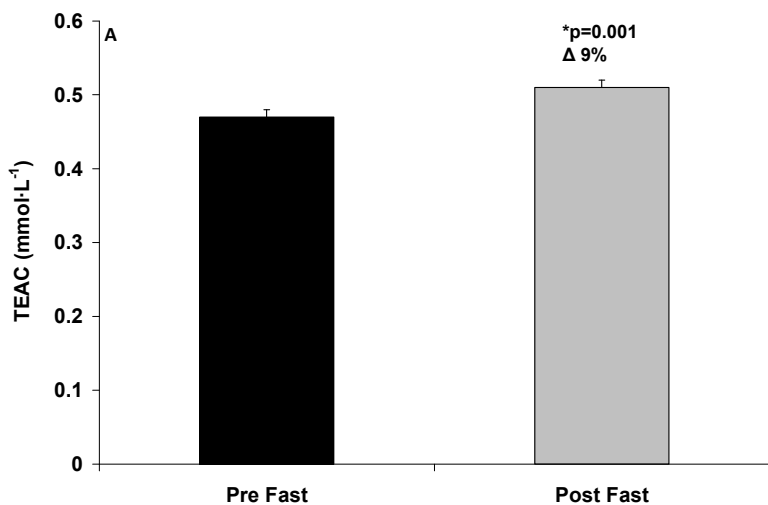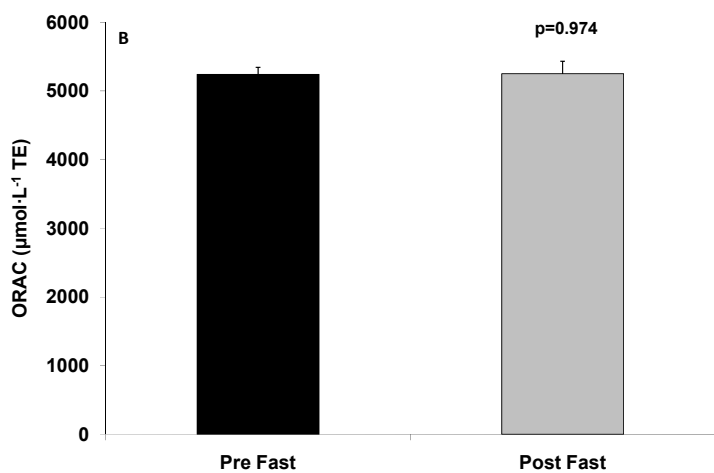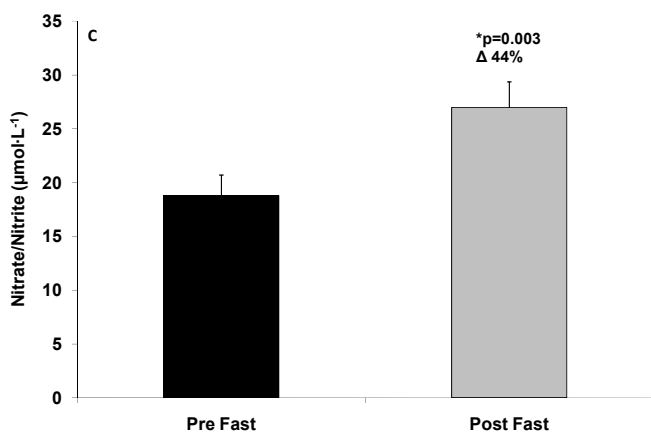

Supplement: 12986_2010_317_MOESM2_ESM.pdf [file 12986_2010_317_MOESM2_ESM.pdf]
